# Supplementary material for: Parathyroidectomy Improves the Consumption of Erythropoiesis-Stimulating Agents in Hemodialysis Patients
Source: MDPI journal article supplement (doi:10.3390/ijms231810391), 2022-09-08
Supplement: s1 [file s1]

**Table S1** The effects of parathyroidectomy on ESA therapy

| <b>Parameter</b>          | <b><math>\beta</math></b> | <b>SE</b> | <b>Wald</b> | <b>p-value</b> |
|---------------------------|---------------------------|-----------|-------------|----------------|
| Intercept                 | -13.7                     | 34.6      | 0.15        | 0.692          |
| ESA therapy               |                           |           |             |                |
| Pre-PTX vs Post-PTX       | -10.6                     | 4.03      | 6.97        | 0.008          |
| Sex (male)                | -10.4                     | 11.3      | 0.83        | 0.361          |
| Age at HD                 | 0.59                      | 0.48      | 1.46        | 0.227          |
| BMI                       | 1.47                      | 1.08      | 1.85        | 0.173          |
| Functional IDA            | 16.5                      | 10.9      | 2.28        | 0.131          |
| Comorbidities             |                           |           |             |                |
| Liver disease             | -29.1                     | 13.7      | 4.47        | 0.034          |
| Rheumatologic disease     | 18.2                      | 23.1      | 0.62        | 0.430          |
| Diabetes mellitus         | -6.73                     | 11.1      | 0.47        | 0.490          |
| Cerebral vascular disease | -27.8                     | 12.2      | 5.19        | 0.023          |
| Hypertension              | 6.25                      | 15.5      | 0.16        | 0.687          |
